# Supplementary material
Source: PubMed Central journal article supplement (PMC1959442)

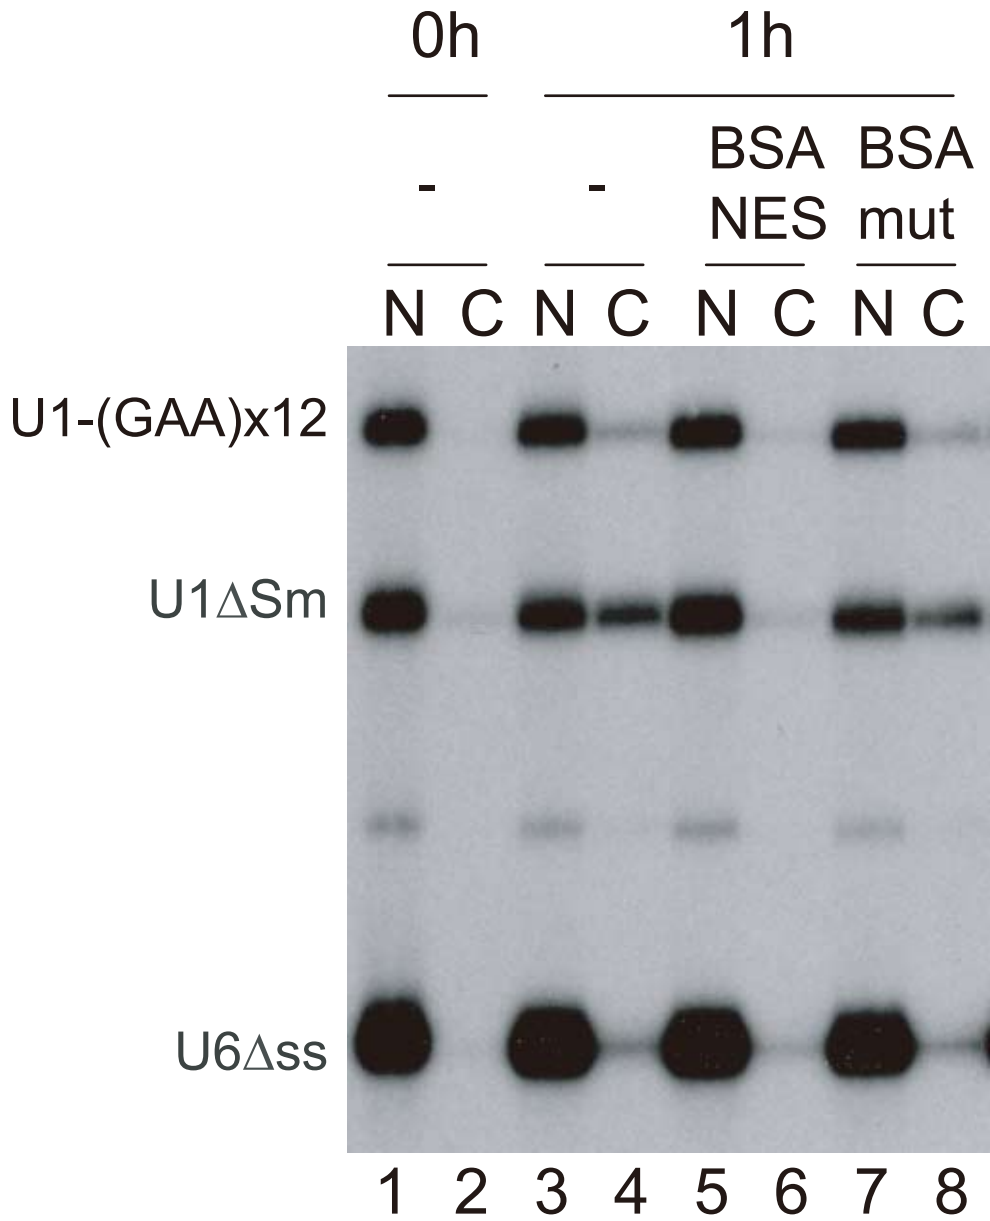

Supplement: pnas_0704922104_1.pdf [file pnas_0704922104_1.pdf]
